# Supplementary material for: Understanding community health worker incentive preferences in Uganda using a discrete choice experiment
Source: PubMed Central journal article supplement (PMC7956012; doi:10.7189/jogh.11.07005), 2021-03-10
Supplement: jogh-11-07005-s001.pdf [file jogh-11-07005-s001.pdf]

## Appendix S1: Relative importance estimates

| <b>Attribute</b>         | <b>Absolute Value<br/>(Effect)</b> | <b>Difference in<br/>Levels</b> | <b>Maximum<br/>Effect</b> | <b>Relative Importance<br/>Estimates</b> | <b>Ranking</b> |
|--------------------------|------------------------------------|---------------------------------|---------------------------|------------------------------------------|----------------|
| Stipend                  | 0.1                                | 15                              | 1.5                       | 0.17                                     | 4              |
| Refresher<br>Trainings   | 0.53                               | 3                               | 1.59                      | 0.18                                     | 3              |
| Identification           | 1.61                               | 1                               | 1.61                      | 0.18                                     | 2              |
| Availability of<br>Tools | 0.41                               | 1                               | 0.41                      | 0.05                                     | 7              |
| Means of<br>Transport    | 1.86                               | 1                               | 1.86                      | 0.21                                     | 1              |
| Recognition              | 0.92                               | 1                               | 0.92                      | 0.10                                     | 6              |
| Workload                 | 0.5                                | 2                               | 1                         | 0.11                                     | 5              |
| <b>Total</b>             |                                    |                                 | 8.89                      |                                          |                |
